# Supplementary material for: DACCOR–Detection, characterization, and reconstruction of repetitive regions in bacterial genomes
Source: PeerJ. 2018 May 29;6:e4742. doi: 10.7717/peerj.4742 (PMC5983011; doi:10.7717/peerj.4742)
Supplement: Supplemental Information 6 [file peerj-06-4742-s006.xlsx]

## Sheet: Supplementary_Table_2_snpTable23S
Position	Ref	ARG1	ARG2	ARG3	ARG4	BAL3	BAL73	BAL9	C22	C23	C24	C25	C26	C27	C28	C30	C31	C32	C33	C34	CDC	GHA1	GRA1	GRA2	HAIB	IND1	IND2	IRAB	N12	N13	N14	N15	N16	N17	N18	N19	N20	N21	NIC1	NIC2	PhiL1	S1	S10	S11	S12	S13	S14	S15	S16
223	G	.	.	.	.	.	.	.	.	N	N	N	N	.	N	N	N	N	.	N	.	.	N	.	.	.	.	.	.	.	.	.	.	.	N	.	.	N	.	.	.	.	N	N	N	.	N	.	.
224	A	.	.	.	.	.	.	.	.	N	N	N	N	.	N	N	N	N	.	N	.	.	N	.	.	.	.	.	N	.	.	.	.	.	N	.	.	N	.	.	.	.	N	N	N	.	N	.	.
254	T	.	.	.	.	.	.	N	.	N	N	N	N	.	N	N	N	N	.	N	.	.	N	.	.	.	N	N	N	N	.	.	N	.	N	N	.	C	.	.	.	.	N	N	N	.	N	.	.
259	G	.	.	.	.	.	.	N	.	N	N	N	.	.	N	N	N	N	.	N	.	.	N	.	N	.	N	N	N	N	.	.	N	.	N	N	.	N	.	.	.	.	N	N	N	.	N	.	.
521	A	.	.	.	N	.	.	.	N	N	N	N	.	.	N	N	N	N	.	X	.	.	N	.	.	.	.	N	.	.	.	.	N	.	N	.	.	X	.	.	.	.	N	N	N	.	N	.	.
761	G	.	.	.	.	.	.	X	.	N	N	N	.	.	N	N	N	N	.	.	X	A	N	.	N	A	X	X	.	.	.	.	N	.	N	.	.	N	.	.	.	.	N	N	N	.	N	.	.
852	G	.	.	.	.	.	.	.	.	N	N	N	.	.	N	N	N	N	.	.	.	.	.	.	.	.	.	.	.	.	.	.	N	.	N	.	.	N	.	.	.	.	N	N	N	.	A	.	.
900	C	.	.	.	.	.	.	.	.	N	N	N	.	.	.	N	N	N	.	N	.	.	N	.	.	.	N	N	.	.	.	.	N	.	N	.	.	N	.	.	.	.	N	N	N	.	T	.	.
902	G	.	.	.	.	.	.	.	.	N	N	N	.	.	.	N	N	N	.	N	.	.	N	.	.	.	N	N	.	.	.	.	N	.	N	.	.	N	.	.	.	.	N	N	N	.	A	.	.
903	T	.	.	.	.	.	.	.	.	N	N	N	.	.	.	N	N	N	.	N	.	.	N	.	.	.	N	N	.	.	.	.	N	.	N	.	.	N	.	.	.	.	N	N	N	.	C	.	.
925	G	.	.	.	.	.	.	N	.	N	N	N	.	.	.	N	N	N	.	N	.	.	N	.	.	.	N	N	.	.	.	.	N	.	N	.	.	N	.	.	.	.	N	N	N	.	A	.	.
1094	G	.	N	N	.	.	.	N	.	N	N	N	.	.	N	N	N	N	.	N	N	.	N	.	.	.	N	N	.	.	.	.	.	.	N	.	.	N	.	.	.	.	N	N	N	.	A	.	.
1099	G	N	.	N	N	.	.	N	.	N	N	N	.	.	N	N	N	N	.	N	N	.	N	.	.	.	N	N	.	.	.	.	.	.	N	.	.	N	.	.	.	.	A	N	.	.	X	.	.
1159	G	N	.	N	.	.	.	.	.	N	N	N	.	.	N	N	N	N	.	N	N	.	N	.	.	.	.	N	.	.	.	.	N	.	N	.	.	N	.	.	.	.	X	N	N	.	A	.	.
1163	A	.	.	N	.	.	.	.	.	N	N	N	.	.	N	N	N	N	.	N	N	.	N	.	.	.	N	N	.	.	.	.	N	.	N	.	.	N	.	.	.	.	X	N	G	.	N	.	.
1912	C	N	.	.	.	.	.	N	.	N	N	N	.	.	N	N	N	N	.	N	.	.	N	.	.	.	N	.	.	.	.	.	N	.	N	.	.	N	.	.	.	.	G	N	N	.	X	.	.
1915	A	.	.	.	N	.	.	N	.	N	N	N	.	.	N	N	X	N	.	N	N	.	N	.	.	.	N	.	.	.	X	N	N	.	N	N	.	N	.	.	.	.	G	N	N	.	X	.	.
1917	C	X	.	.	X	.	.	N	N	N	A	N	.	.	N	N	X	N	.	N	N	.	N	.	.	.	N	N	.	.	X	N	N	.	N	X	.	N	.	.	.	.	A	N	N	.	A	.	.
1919	C	.	.	.	N	.	.	N	.	N	G	N	.	.	N	X	X	N	.	N	N	.	N	.	N	.	N	N	.	.	X	.	G	.	N	N	.	N	.	.	.	.	N	N	.	N	X	.	.
1921	T	N	.	.	.	.	.	N	N	C	.	N	N	.	N	X	.	N	.	X	N	.	N	.	.	.	N	N	.	N	.	.	.	.	N	.	.	C	.	.	.	.	X	N	X	N	X	.	.
1923	G	.	.	.	.	.	.	N	N	N	.	N	N	.	.	.	.	N	.	N	N	.	N	.	.	.	N	N	.	N	.	.	.	.	N	.	.	T	.	.	.	.	.	N	X	.	.	.	.
1924	A	.	.	.	.	.	.	N	N	N	.	N	N	.	.	.	.	N	.	N	.	.	N	.	.	.	N	N	.	N	.	.	.	.	N	.	.	G	.	.	.	.	.	N	X	.	.	.	.
1927	T	X	.	.	.	.	.	N	.	.	.	N	.	.	.	N	.	N	.	X	.	.	N	.	.	.	N	N	.	.	.	.	.	.	N	.	.	N	.	.	.	.	.	N	N	.	.	.	.
1936	A	.	.	.	N	.	.	N	N	N	N	N	.	.	N	X	X	N	N	X	.	.	N	.	.	.	N	N	N	.	N	.	N	.	N	X	.	N	.	.	.	N	N	N	.	.	.	.	.
2003	C	N	X	N	X	.	N	N	X	X	X	N	X	N	X	X	X	N	X	X	N	.	N	.	N	.	N	N	X	N	X	X	X	X	T	X	.	T	.	.	.	X	X	N	X	X	X	N	N
2014	T	X	N	.	.	.	.	N	X	C	N	N	X	.	N	N	.	N	N	N	N	.	N	.	.	.	N	N	X	N	.	.	N	N	X	N	.	N	.	.	.	.	N	N	C	N	X	.	.
2022	C	.	.	.	.	.	.	N	.	N	N	N	N	.	.	X	T	N	.	.	N	.	N	.	.	.	N	N	.	N	.	.	.	.	N	X	.	N	.	.	.	.	N	N	N	.	N	.	.
2028	A	N	.	.	.	.	.	.	.	N	X	N	N	.	N	G	X	N	N	X	N	.	N	.	.	.	.	N	N	N	N	.	N	.	N	X	.	N	.	.	.	.	X	N	N	.	X	.	.
2038	G	N	.	.	N	.	.	.	.	N	N	N	.	.	N	N	N	N	N	N	.	.	N	.	.	.	.	.	N	N	.	.	.	.	N	X	.	N	.	.	.	.	A	N	N	.	A	.	.
2042	C	.	.	.	N	.	.	.	N	N	N	N	.	.	N	N	N	N	.	N	.	.	N	.	.	.	.	.	.	.	.	.	.	.	N	.	.	N	.	.	.	.	A	N	N	.	X	.	.
2062	G	.	.	.	N	.	.	.	N	N	N	N	.	.	N	N	N	N	.	.	.	.	N	.	.	.	.	N	.	N	.	.	.	.	N	X	.	N	.	.	.	.	N	N	N	.	A	.	.
2099	A	N	.	.	.	.	.	.	G	N	N	N	.	.	N	X	N	N	G	X	.	.	.	.	.	.	.	.	G	G	G	G	N	G	N	X	G	N	.	.	.	G	N	N	N	G	X	G	G
2100	A	.	.	.	.	.	.	.	.	N	N	N	.	.	N	.	N	N	.	.	.	.	.	.	.	.	.	.	.	.	.	.	N	.	N	.	.	N	.	.	.	.	N	N	N	.	.	.	.
2503	T	N	N	.	N	.	.	N	N	N	N	N	.	.	N	N	C	N	.	.	.	.	N	.	.	.	.	N	N	.	N	.	.	.	N	X	.	X	.	.	.	.	C	N	X	.	X	.	.
2516	T	X	.	.	.	.	.	N	N	N	N	N	.	.	N	.	X	N	.	.	.	.	N	.	.	.	.	N	.	.	N	.	.	.	N	N	.	N	.	.	.	.	X	N	N	.	X	.	.
2528	G	.	.	N	.	.	.	N	N	N	N	N	N	.	N	.	.	N	.	.	.	.	N	.	.	.	.	N	N	.	.	.	.	.	N	N	.	X	.	.	.	.	.	N	C	.	.	.	.
2531	A	X	.	N	N	.	.	N	N	N	N	N	.	.	N	X	G	N	N	X	.	.	N	.	.	.	.	N	X	N	X	.	X	.	N	X	.	X	.	.	.	.	G	N	N	N	G	.	.
2558	G	.	.	N	.	.	.	N	N	X	X	N	N	.	X	X	.	N	N	N	N	.	N	.	.	.	N	N	X	N	.	.	.	.	N	N	.	X	.	.	.	.	X	X	X	N	N	.	.
2572	A	N	.	N	N	.	.	N	N	X	G	N	N	.	X	X	X	N	.	X	N	.	N	.	.	.	N	N	X	N	X	N	X	N	N	X	.	X	.	.	.	N	X	X	G	N	X	.	.
2575	C	X	.	N	.	.	.	N	.	N	N	N	N	.	N	.	X	N	N	X	N	.	N	.	.	.	N	N	.	.	.	N	X	.	N	X	.	.	.	.	.	N	X	X	N	.	X	.	.
2589	T	.	.	N	.	.	.	N	N	.	.	N	.	.	.	N	X	N	.	.	N	.	N	.	.	.	N	N	N	N	X	N	.	.	N	N	.	N	.	.	.	.	X	N	.	.	N	.	.
2590	T	X	.	N	.	.	.	N	N	.	N	N	.	.	N	N	X	N	.	X	N	.	N	.	.	.	N	N	X	N	.	N	X	.	N	N	.	X	.	.	.	N	X	X	N	.	X	.	.
2602	A	C	.	.	N	.	.	N	N	.	X	N	N	.	N	X	X	N	.	X	N	.	N	.	.	.	N	N	X	N	.	N	X	.	N	N	.	X	.	.	.	N	X	N	G	.	X	.	.
2617	T	X	.	.	.	.	.	N	N	.	N	N	.	.	.	X	C	N	.	X	N	.	N	.	.	.	N	N	X	N	X	N	.	.	N	X	.	.	.	.	.	.	X	N	.	.	X	.	.
2638	C	X	.	.	.	.	.	N	N	.	X	N	.	.	N	X	T	N	.	X	N	.	N	.	.	.	N	N	X	N	N	.	X	.	N	X	.	X	.	.	.	N	T	N	T	N	T	.	.
2648	C	.	.	.	.	.	.	N	N	T	N	N	.	.	N	.	.	N	.	.	.	.	N	.	.	.	N	N	.	.	.	.	.	.	N	.	.	X	.	.	.	.	.	N	N	N	.	.	.
[truncated: 64 more columns]
