# Supplementary material for: DACCOR–Detection, characterization, and reconstruction of repetitive regions in bacterial genomes
Source: PeerJ journal article supplement (doi:10.7717/peerj.4742), 2018-05-29

# Runtime comparison between DACCOR and Vmatch

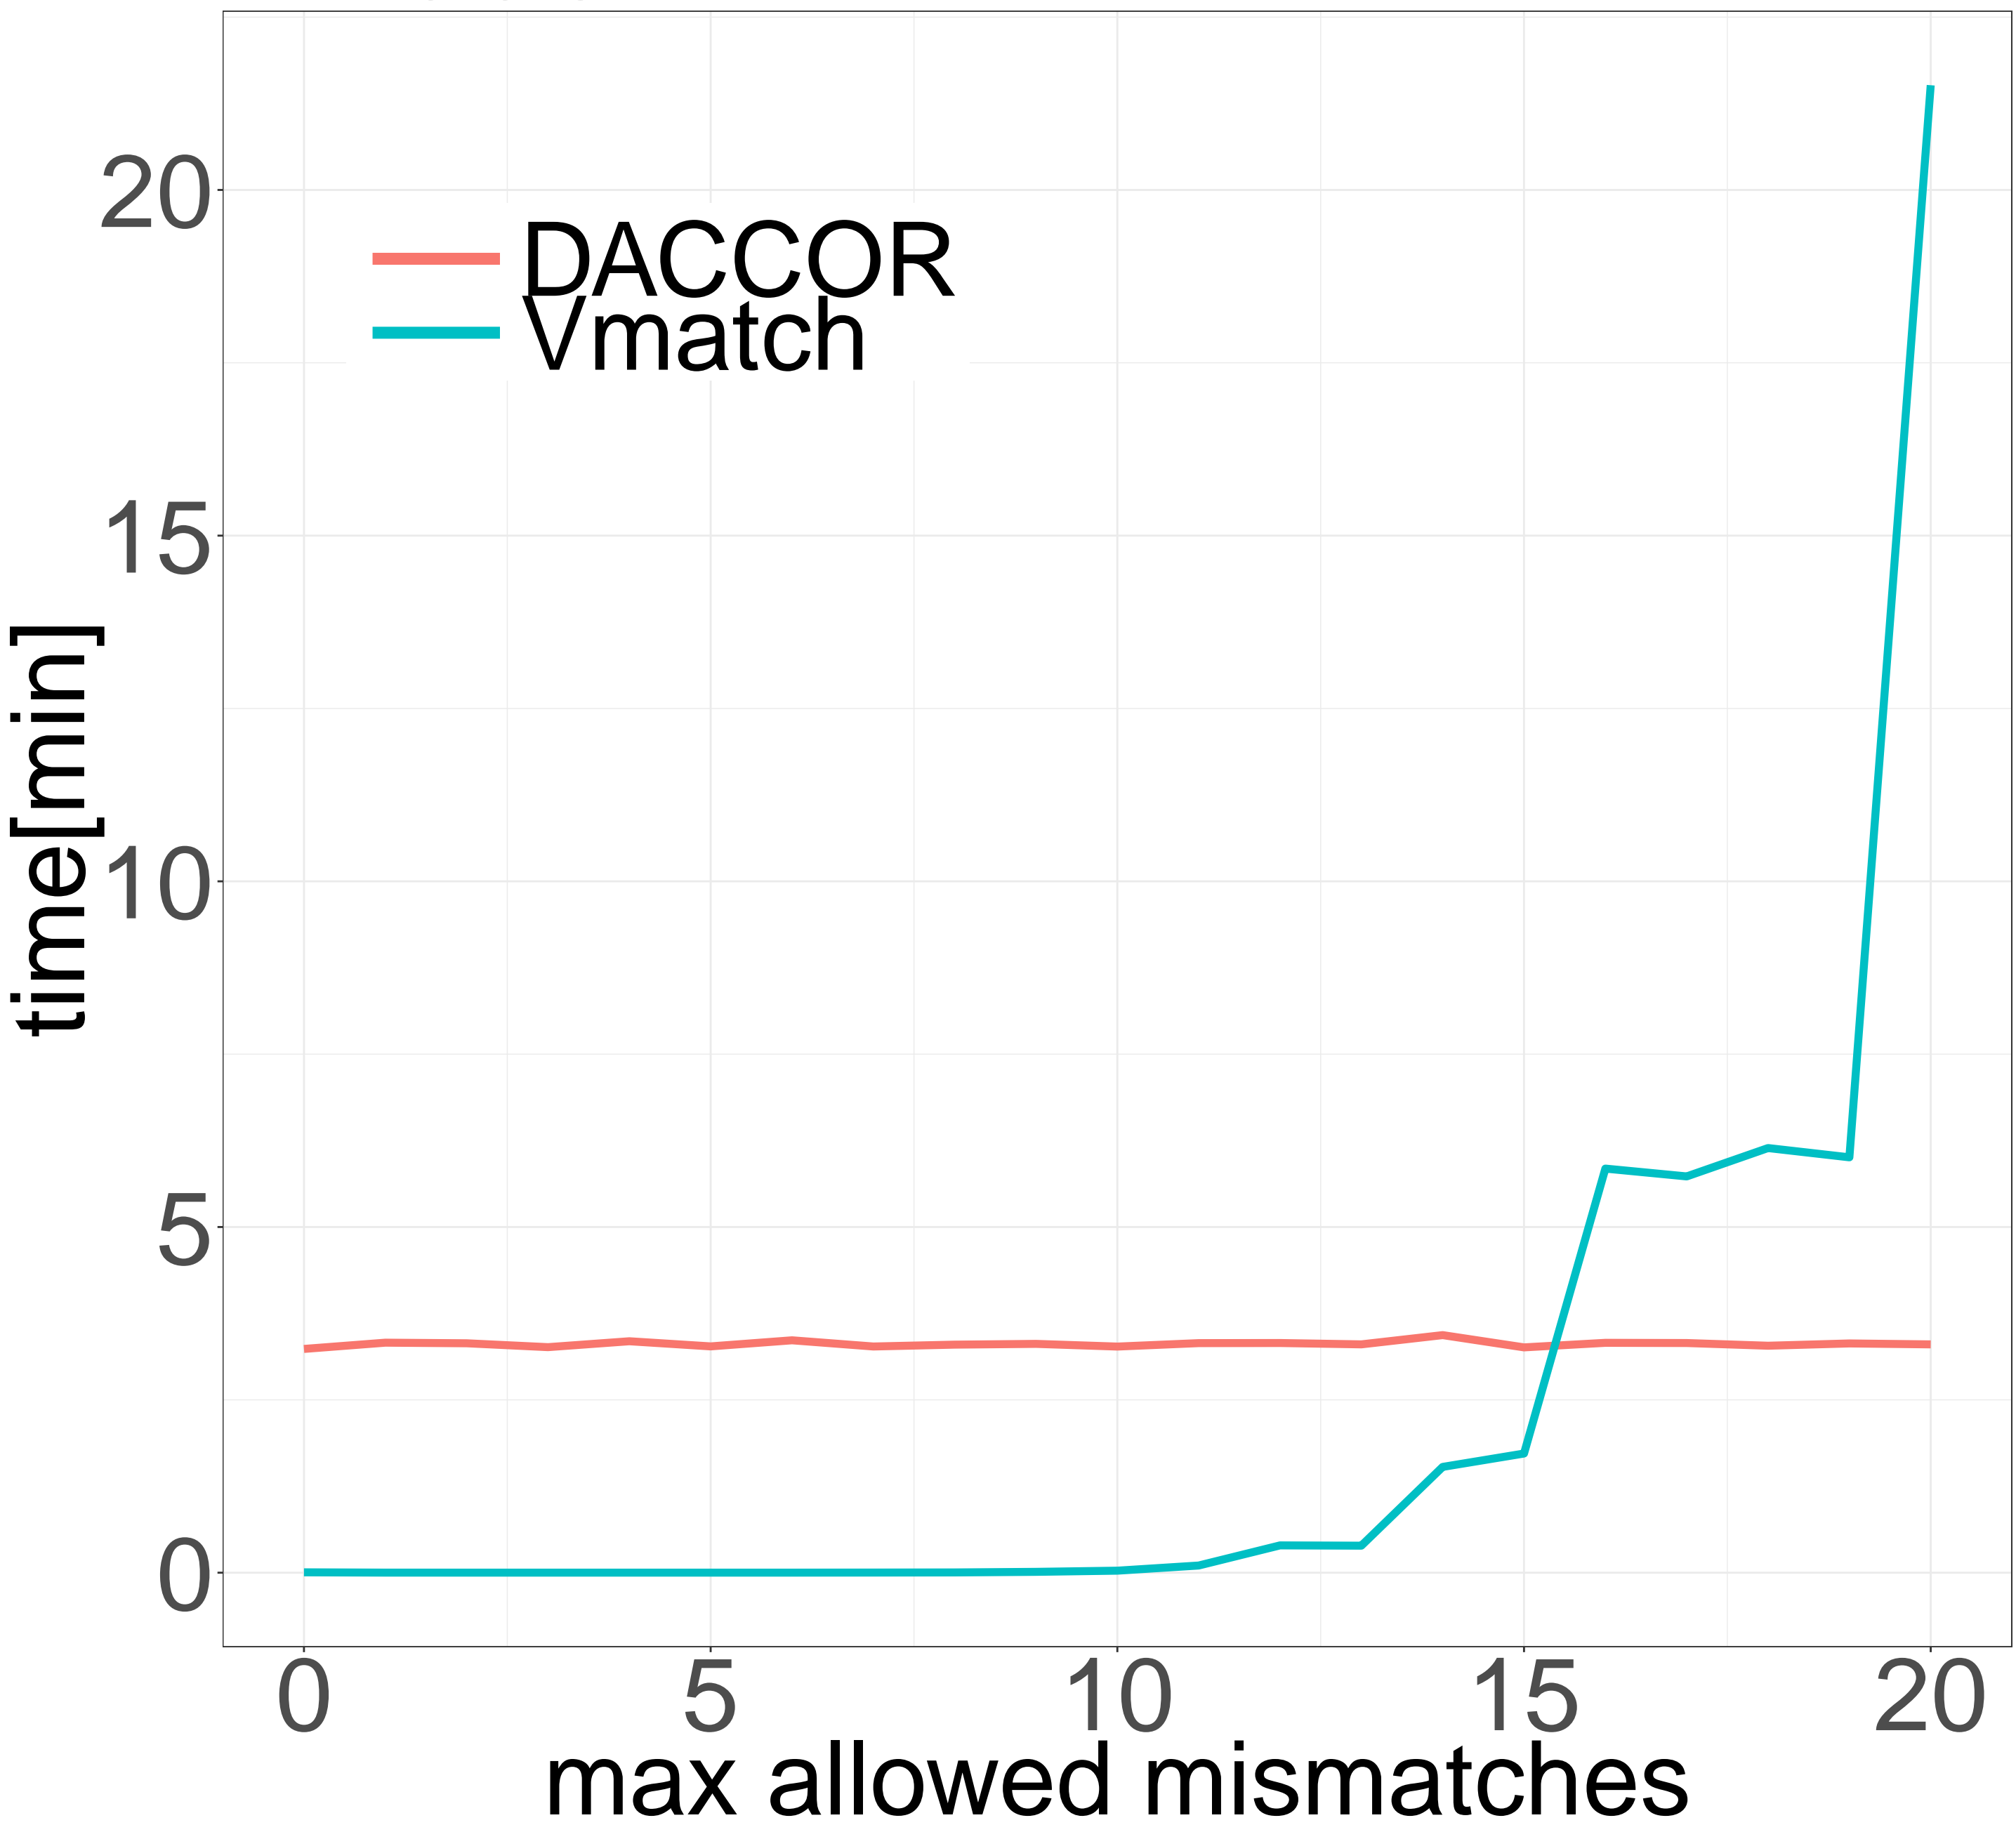

Supplement: Supplementary_Fig2_runtime_comparison.pdf [file Supplementary_Fig2_runtime_comparison.pdf]
